# Supplementary material
Source: PubMed Central journal article supplement (PMC4081955)
Supplement: supp_M114.556704_jbc.M114.556704-1.pdf [file supp_M114.556704_jbc.M114.556704-1.pdf]

## Supporting Information (SI)

### Cu(I)-mediated allosteric switching in a copper-sensing operon repressor (CsoR)

Chang *et al.*

**Table S1.** Biochemically and structurally characterized DUF156 (CsoR/RcnR) proteins used to interpret the multiple sequence alignment and the phylogenetic tree shown in **Fig. 1** (main text). The CsoR structurally characterized here is highlighted in red.

| Protein ID     | Clade ID   | UniProt number | Organism                                      | Locus tag        | Inducer(s)                                     | Structure of apo/holo-form | PDB ID      | References       |
|----------------|------------|----------------|-----------------------------------------------|------------------|------------------------------------------------|----------------------------|-------------|------------------|
| CsoR_Mtb       | Ia         | P71543         | <i>Mycobacterium tuberculosis</i>             | Rv0967           | Cu(I)                                          | Homotetramer               | 2HH7        | (1)              |
| CsoR_Tt        | Ib         | Q5SHL1         | <i>Thermus thermophilus</i>                   | TTHA1719         | Cu(I)                                          |                            | 3AAI        | (2)              |
| NcrB_Lf        | Ic         | Q06VT2         | <i>Leptospirillum ferriphilum</i>             | ncrB             | Ni(II)/Co(II)                                  |                            |             | (3)              |
| RcnR           | IIa        | P64530         | <i>Escherichia coli</i>                       | yohL             | Ni(II)/Co(II)                                  | Homotetramer               |             | (4,5)            |
| FrmR           | IIb        | P0AAP3         | <i>Escherichia coli</i>                       | yaiN             | Formaldehyde                                   |                            |             | (6)              |
| CsoR_Cg        | IIIa       | A4QB25         | <i>Corynebacterium glutamicum</i>             | cgR_0458         | Cu(I)                                          |                            |             | (7)              |
| CsoR_Sli       | IIIb       | Q9KZW5         | <i>Streptomyces lividans</i>                  | SCO4136          | Cu(I)                                          | Homotetramer               | 4ADZ        | (8)              |
| RicR_Mtb       | IIIc       | O07434         | <i>Mycobacterium tuberculosis</i>             | MT0200           | Cu(I)                                          | Homotetramer <sup>a</sup>  |             | (9)              |
| CsoR_Bsu       | IVa        | O32222         | <i>Bacillus subtilis</i>                      | BSU33520         | Cu(I)                                          | Homotetramer               |             | (10,11)          |
| <b>CsoR_Gt</b> | <b>IVb</b> | <b>A4INJ9</b>  | <b><i>Geobacillus thermodenitrificans</i></b> | <b>GTNG_1533</b> | <b>Cu(I)</b>                                   | <b>Homotetramer</b>        | <b>4M1P</b> | <b>This work</b> |
| CsoR_Lmo       | IVc        | Q8Y646         | <i>Listeria monocytogenes</i>                 | Lmo1854          | Cu(I)                                          |                            |             | (12)             |
| CstR_Sau       | V          |                | <i>Staphylococcus aureus</i>                  | NWMN_26.5        | HS <sup>-</sup> /SO <sub>3</sub> <sup>-2</sup> |                            |             | (13)             |
| CsoR_Sau       | VI         | A6QIT1         | <i>Staphylococcus aureus</i>                  | NWMN_1991        | Cu(I)                                          |                            |             | (13)             |
| InrS_Syn       | VII        | Q55554         | <i>Synechocystis</i> PCC 6803                 | sll0176          | Ni(II)                                         | Homotetramer               |             | (14)             |

<sup>a</sup>B. Kester, F. Chang, D. Giedroc, unpublished data.

**Table S2.** UniProt numbers for all nonredundant 227 DUF156 sequences used to infer the phylogenetic analysis (see **Fig. 1**, main text). Representative proteins for each subgroup are highlighted in the *red* text while *Gt* CsoR is highlighted in *green*.

| Clade ID      | UniProt number                           | Organism                                              |
|---------------|------------------------------------------|-------------------------------------------------------|
| Ia            | B2HRV7                                   | <i>Mycobacterium marinum</i>                          |
|               | D5P3A4                                   | <i>Mycobacterium parascrofulaceum</i>                 |
|               | G0TG78                                   | <i>Mycobacterium canettii</i>                         |
|               | <b>P71543</b>                            | <b><i>Mycobacterium tuberculosis</i></b>              |
|               | D6FPL0                                   | <i>Mycobacterium tuberculosis</i>                     |
|               | E2UJB5                                   | <i>Mycobacterium tuberculosis</i>                     |
|               | F4CKQ7                                   | <i>Pseudonocardia dioxanivorans</i>                   |
|               | B2HH23                                   | <i>Mycobacterium marinum</i>                          |
| A0PLB8        | <i>Mycobacterium ulcerans</i>            |                                                       |
| Ib            | Q7NE35                                   | <i>Gloeobacter violaceus</i>                          |
|               | F0RPY0                                   | <i>Deinococcus proteolyticus</i>                      |
|               | H8GUG6                                   | <i>Deinococcus gobiensis</i>                          |
|               | Q1J3E5                                   | <i>Deinococcus geothermali</i>                        |
|               | C1D2I3                                   | <i>Deinococcus deserti</i>                            |
|               | D7CRA7                                   | <i>Truepera radiovictrix</i>                          |
|               | H1NWI8                                   | <i>Holophaga foetida</i>                              |
|               | E4UA60                                   | <i>Oceanithermus profundus</i>                        |
|               | D3PLW2                                   | <i>Meiothermus ruber</i>                              |
|               | D7BGS1                                   | <i>Meiothermus silvanus</i>                           |
|               | F2NR74                                   | <i>Marinithermus hydrothermalis</i>                   |
|               | G8NB26                                   | <i>Thermus</i>                                        |
|               | E8PKY0                                   | <i>Thermus scotoductus</i>                            |
|               | H7GHY2                                   | <i>Thermus sp. RL</i>                                 |
|               | <b>Q5SHL1</b>                            | <b><i>Thermus thermophilus</i></b>                    |
|               | H5SN98                                   | uncultured <i>Thermus/Deinococcus</i> group bacterium |
|               | B7A606                                   | <i>Thermus aquaticus</i>                              |
| Ic            | Q88IN0                                   | <i>Pseudomonas putida</i>                             |
|               | Q44590                                   | <i>Alcaligenes xylosoxydans xylosoxydans</i>          |
|               | A1WLJ0                                   | <i>Verminephrobacter eiseniae</i>                     |
|               | C7RW62                                   | <i>Accumulibacter phosphatis</i>                      |
|               | Q0FIN3                                   | <i>Mariprofundus ferrooxydans</i>                     |
|               | B9Z0S0                                   | <i>Pseudogulbenkiania ferrooxydans</i>                |
|               | G0C7G9                                   | <i>Serratia</i>                                       |
|               | D4BYS5                                   | <i>Providencia rettgeri</i>                           |
|               | H3MEZ5                                   | <i>Klebsiella oxytoca</i>                             |
|               | Q1KLR1                                   | <i>Serratia marcescens</i>                            |
|               | H3MVD2                                   | <i>Klebsiella oxytoca</i>                             |
|               | <b>Q06VT2</b>                            | <b><i>Leptospirillum ferriphilum</i></b>              |
|               | Q6RUG2                                   | <i>Klebsiella oxytoca</i>                             |
|               | Q93M45                                   | <i>Legionella pneumophila</i>                         |
|               | Q12AN4                                   | <i>Polaromonas sp.</i>                                |
|               | H0HUQ8                                   | <i>Mesorhizobium alhagi</i>                           |
|               | G9AHM6                                   | <i>Rhizobium fredii</i>                               |
|               | Q2K0K6                                   | <i>Rhizobium etli</i>                                 |
|               | B3PWC0                                   | <i>Rhizobium etli</i>                                 |
| IIa           | A9MRK3                                   | <i>Salmonella arizonae</i>                            |
|               | D2TJK2                                   | <i>Citrobacter rodentium</i>                          |
|               | G9Z4D7                                   | <i>Yokenella regensburgei</i>                         |
|               | C1MB27                                   | <i>Citrobacter sp.</i>                                |
|               | F7MY94                                   | <i>Escherichia coli</i>                               |
|               | E7T4V7                                   | <i>Shigella boydii</i>                                |
|               | B1EK43                                   | <i>Escherichia albertii</i>                           |
|               | H5QVT8                                   | <i>Escherichia coli</i>                               |
| H5NB78        | <i>Escherichia coli</i>                  |                                                       |
| E3PCP9        | <i>Escherichia coli</i>                  |                                                       |
| IIb           | F4VH74                                   | <i>Escherichia coli</i>                               |
|               | C0ST98                                   | <i>Escherichia coli</i>                               |
|               | H4VJ75                                   | <i>Escherichia coli</i>                               |
|               | E2X0R0                                   | <i>Escherichia coli</i>                               |
|               | <b>P64530</b>                            | <b><i>Escherichia coli</i></b>                        |
|               | G1YBA7                                   | <i>Escherichia coli</i>                               |
|               | B5JUQ3                                   | <i>gamma proteobacterium</i>                          |
|               | D8A2B2                                   | <i>Escherichia coli</i>                               |
|               | F4VAD6                                   | <i>Escherichia coli</i>                               |
|               | D7ZJL9                                   | <i>Escherichia coli</i>                               |
| H5H2W4        | <i>Escherichia coli</i>                  |                                                       |
| <b>P0AAP3</b> | <b><i>Escherichia coli</i></b>           |                                                       |
| H4ZQC4        | <i>Escherichia coli</i>                  |                                                       |
| I0QLA2        | <i>Serratia sp.</i>                      |                                                       |
| H5VPY7        | <i>Salmonella enterica</i>               |                                                       |
| Q8KKB0        | <i>Proteus vulgaris</i>                  |                                                       |
| D1P3L2        | <i>Providencia rustigianii</i>           |                                                       |
| G7LSK1        | <i>Brenneria sp.</i>                     |                                                       |
| B2SZZ0        | <i>Burkholderia phytofirmans</i>         |                                                       |
| Q1IAA5        | <i>Pseudomonas entomophila</i>           |                                                       |
| B9BFA7        | <i>Burkholderia multivorans</i>          |                                                       |
| F0DZ53        | <i>Pseudomonas sp.</i>                   |                                                       |
| Q8UGZ5        | <i>Agrobacterium tumefaciens</i>         |                                                       |
| IIIa          | G0HDW3                                   | <i>Corynebacterium variabile</i>                      |
|               | G8RI37                                   | <i>Mycobacterium rhodesiae</i>                        |
|               | C7MDY5                                   | <i>Brachybacterium faecium</i>                        |
|               | G7GSB0                                   | <i>Gordonia amarae</i>                                |
|               | E2SCC2                                   | <i>Aeromicrobium marinum</i>                          |
|               | A1RCP4                                   | <i>Arthrobacter aurescens</i>                         |
|               | D2PLJ6                                   | <i>Kribbella flavida</i>                              |
|               | H5U7Y6                                   | <i>Gordonia terrae</i>                                |
|               | F9VS64                                   | <i>Gordonia alkanivorans</i>                          |
|               | D0LEV5                                   | <i>Gordonia bronchialis</i>                           |
|               | E6J497                                   | <i>Dietzia cinnamea</i>                               |
|               | C2GID9                                   | <i>Corynebacterium glucuronolyticum</i>               |
|               | C0XQS9                                   | <i>Corynebacterium lipophiloflavum</i>                |
| <b>A4QB25</b> | <b><i>Corynebacterium glutamicum</i></b> |                                                       |
| Q8FSI5        | <i>Corynebacterium efficiens</i>         |                                                       |
| IIIb          | F3NEI7                                   | <i>Streptomyces griseoaurantiacus</i>                 |
|               | D5ZS95                                   | <i>Streptomyces ghanaensis</i>                        |
|               | D9XRU9                                   | <i>Streptomyces griseoflavus</i>                      |
|               | D9WXW3                                   | <i>Streptomyces viridochromogenes</i>                 |
|               | D6B9L0                                   | <i>Streptomyces albus</i>                             |
|               | B5HLZ2                                   | <i>Streptomyces sviveus</i>                           |
|               | G2NCY4                                   | <i>Streptomyces sp.</i>                               |
|               | G0PV66                                   | <i>Streptomyces griseus</i>                           |
|               | D6APN9                                   | <i>Streptomyces roseosporus</i>                       |
|               | Q82G20                                   | <i>Streptomyces avermitilis</i>                       |
|               | G2GAM7                                   | <i>Streptomyces zinciresistens</i>                    |
|               | C9ZFK1                                   | <i>Streptomyces scabies</i>                           |
|               | H1QSR5                                   | <i>Streptomyces coelicoflavus</i>                     |
|               | <b>Q9KZW5</b>                            | <b><i>Streptomyces lividans</i></b>                   |
|               | D6EK73                                   | <i>Streptomyces lividans</i>                          |
| IIIc          | B8ZTH5                                   | <i>Mycobacterium leprae</i>                           |
|               | D5P6F4                                   | <i>Mycobacterium parascrofulaceum</i>                 |
|               | I0RZC1                                   | <i>Mycobacterium phlei</i>                            |
|               | I0RNH6                                   | <i>Mycobacterium xenopi</i>                           |
|               | <b>O07434</b>                            | <b><i>Mycobacterium tuberculosis</i></b>              |
|               | D5YB34                                   | <i>Mycobacterium tuberculosis</i>                     |
|               | H6SSC9                                   | <i>Mycobacterium tuberculosis</i>                     |

|        |                                   |                                               |
|--------|-----------------------------------|-----------------------------------------------|
|        | H8JM13                            | <i>Mycobacterium intracellulare</i>           |
|        | B2HMW1                            | <i>Mycobacterium marinum</i>                  |
|        | F9QKS4                            | <i>Mycobacterium colombiense</i>              |
|        | F7P7F4                            | <i>Mycobacterium avium</i>                    |
|        | D5PAQ8                            | <i>Mycobacterium parascrofulaceum</i>         |
|        | A1U967                            | <i>Mycobacterium sp.</i>                      |
|        | A3PSS4                            | <i>Mycobacterium sp.</i>                      |
|        | G4HYH3                            | <i>Mycobacterium rhodesiae</i>                |
|        | H1JWI1                            | <i>Mycobacterium tusciae</i>                  |
| IVa    | I0UKK4                            | <i>Bacillus licheniformis</i>                 |
|        | F4EN13                            | <i>Bacillus amyloliquefaciens</i>             |
|        | A7Z8S5                            | <i>Bacillus amyloliquefaciens</i>             |
|        | E1UQL4                            | <i>Bacillus amyloliquefaciens</i>             |
|        | E3DV80                            | <i>Bacillus atrophaeus</i>                    |
|        | D5MXP8                            | <i>Bacillus subtilis</i>                      |
|        | <b>O32222</b>                     | <b><i>Bacillus subtilis</i></b>               |
|        | D4G1E3                            | <i>Bacillus subtilis</i>                      |
|        | G4POR1                            | <i>Bacillus subtilis</i>                      |
| IVb    | C3AZB3                            | <i>Bacillus mycoides</i>                      |
|        | C3BFU7                            | <i>Bacillus pseudomycooides</i>               |
|        | D5T2D1                            | <i>Bacillus thuringiensis</i>                 |
|        | <b>A4INJ9</b>                     | <b><i>Geobacillus thermodenitrificans</i></b> |
|        | I0U905                            | <i>Geobacillus thermoglucosidans</i>          |
|        | F8D055                            | <i>Geobacillus thermoglucosidasius</i>        |
|        | C5D2A2                            | <i>Geobacillus sp.</i>                        |
|        | G9QHY1                            | <i>Bacillus smithii</i>                       |
|        | A4INS6                            | <i>Geobacillus thermodenitrificans</i>        |
|        | C5D228                            | <i>Geobacillus sp.</i>                        |
|        | D7D180                            | <i>Geobacillus sp.</i>                        |
|        | G8MY26                            | <i>Geobacillus thermoleovorans</i>            |
| B7GJE1 | <i>Anoxybacillus flavithermus</i> |                                               |
| IVc    | D7UY58                            | <i>Listeria grayi</i>                         |
|        | Q4EH65                            | <i>Listeria monocytogenes</i>                 |
|        | H1G8K0                            | <i>Listeria innocua</i>                       |
|        | E4A0I5                            | <i>Listeria seeligeri</i>                     |
|        | D3UPF2                            | <i>Listeria seeligeri</i>                     |
|        | E3ZHR5                            | <i>Listeria ivanovii</i>                      |
|        | Q92AF4                            | <i>Listeria innocua serovar 6a</i>            |
|        | D3KXL9                            | <i>Listeria monocytogenes</i>                 |
|        | E3Z8U6                            | <i>Listeria innocua</i>                       |
|        | D4PPT3                            | <i>Listeria monocytogenes</i>                 |
|        | <b>Q8Y646</b>                     | <b><i>Listeria monocytogenes</i></b>          |
|        | C8K240                            | <i>Listeria monocytogenes</i>                 |
| V      | B1YM25                            | <i>Exiguobacterium sibiricum</i>              |
|        | F0P9Q3                            | <i>Staphylococcus pseudintermedius</i>        |
|        | Q8VUY1                            | <i>Staphylococcus hominis</i>                 |
|        | H3V9C4                            | <i>Staphylococcus epidermidis</i>             |
|        | D2N3A3                            | <i>Staphylococcus aureus</i>                  |
|        | I0TVN3                            | <i>Staphylococcus epidermidis</i>             |
|        | F3TW60                            | <i>Staphylococcus epidermidis</i>             |
|        | C5QR26                            | <i>Staphylococcus caprae</i>                  |
|        | C8L5G8                            | <i>Staphylococcus aureus</i>                  |
|        | D9N347                            | <i>Staphylococcus fleurettii</i>              |
|        | Q0ZKM1                            | <i>Staphylococcus sp.</i>                     |
|        | D1R191                            | <i>Staphylococcus aureus</i>                  |
|        | C8LCP6                            | <i>Staphylococcus aureus</i>                  |
|        | H3XIT8                            | <i>Staphylococcus aureus</i>                  |
|        | H0CST2                            | <i>Staphylococcus aureus</i>                  |
|        | <b>CstR_Sau</b>                   | <b><i>Staphylococcus aureus</i></b>           |

|            |                                  |                                                    |
|------------|----------------------------------|----------------------------------------------------|
| VI         | F3SRX6                           | <i>Staphylococcus warneri</i>                      |
|            | C4WBP1                           | <i>Staphylococcus warneri</i>                      |
|            | G5JKX9                           | <i>Staphylococcus simiae</i>                       |
|            | C8MC25                           | <i>Staphylococcus aureus</i>                       |
|            | D2G328                           | <i>Staphylococcus aureus</i>                       |
|            | H7G5D5                           | <i>Staphylococcus aureus</i>                       |
|            | E1E205                           | <i>Staphylococcus aureus</i>                       |
|            | C5N2P9                           | <i>Staphylococcus aureus</i>                       |
|            | E0P3L8                           | <i>Staphylococcus aureus</i>                       |
|            | D6LZU9                           | <i>Staphylococcus aureus</i>                       |
|            | <b>A6QIT1</b>                    | <b><i>Staphylococcus aureus</i></b>                |
|            | C8MRJ4                           | <i>Staphylococcus aureus</i>                       |
|            | H3YH46                           | <i>Staphylococcus aureus</i>                       |
|            | Q2YUG7                           | <i>Staphylococcus aureus</i>                       |
|            | F0DDT2                           | <i>Staphylococcus aureus</i>                       |
|            | F0D6X0                           | <i>Staphylococcus aureus</i>                       |
| VII        | <b>Q55554</b>                    | <b><i>Synechocystis sp.</i></b>                    |
|            | F7URS5                           | <i>Synechocystis sp.</i>                           |
|            | Q8DIK8                           | <i>Thermosynechococcus elongatus</i>               |
|            | B7KLC9                           | <i>Cyanothece sp.</i>                              |
|            | Q8YTG1                           | <i>Nostoc sp.</i>                                  |
|            | B4VKE0                           | <i>Coleofasciculus chthonoplastes</i>              |
|            | B0JIQ2                           | <i>Microcystis aeruginosa</i>                      |
|            | B1WW97                           | <i>Cyanothece sp.</i>                              |
|            | Q4C3T0                           | <i>Crocospaera watsonii</i>                        |
|            | C7QUT0                           | <i>Cyanothece sp.</i>                              |
|            | E0UGY4                           | <i>Cyanothece sp.</i>                              |
|            | F5UE85                           | <i>Microcoleus vaginatus</i>                       |
|            | D8G9T7                           | <i>Oscillatoria sp.</i>                            |
|            | D5A592                           | <i>Arthrospira platensis</i>                       |
| B5VUT3     | <i>Arthrospira maxima</i>        |                                                    |
| H1W7C2     | <i>Arthrospira sp.</i>           |                                                    |
| unassigned | C0GHC4                           | <i>Dethiobacter alkaliphilus</i>                   |
|            | F8IBQ9                           | <i>Sulfobacillus acidophilus</i>                   |
|            | H5SUX9                           | <i>uncultured candidate division OP1 bacterium</i> |
|            | I0I1Y4                           | <i>Caldilinea aerophila</i>                        |
|            | F7Q2B9                           | <i>Haloplasma contractile</i>                      |
|            | C2QFM2                           | <i>Bacillus cereus</i>                             |
|            | C3DNB1                           | <i>Bacillus thuringiensis</i>                      |
|            | C2XF89                           | <i>Bacillus cereus</i>                             |
|            | B9IV31                           | <i>Bacillus cereus</i>                             |
|            | H0NR67                           | <i>Bacillus cereus</i>                             |
|            | C2YDY1                           | <i>Bacillus cereus</i>                             |
|            | C2U1D4                           | <i>Bacillus cereus</i>                             |
|            | E3PTG5                           | <i>Clostridium sticklandii</i>                     |
|            | I0JMB3                           | <i>Halobacillus halophilus</i>                     |
|            | E5WPT7                           | <i>Bacillus sp.</i>                                |
| Q8UGZ5     | <i>Agrobacterium tumefaciens</i> |                                                    |

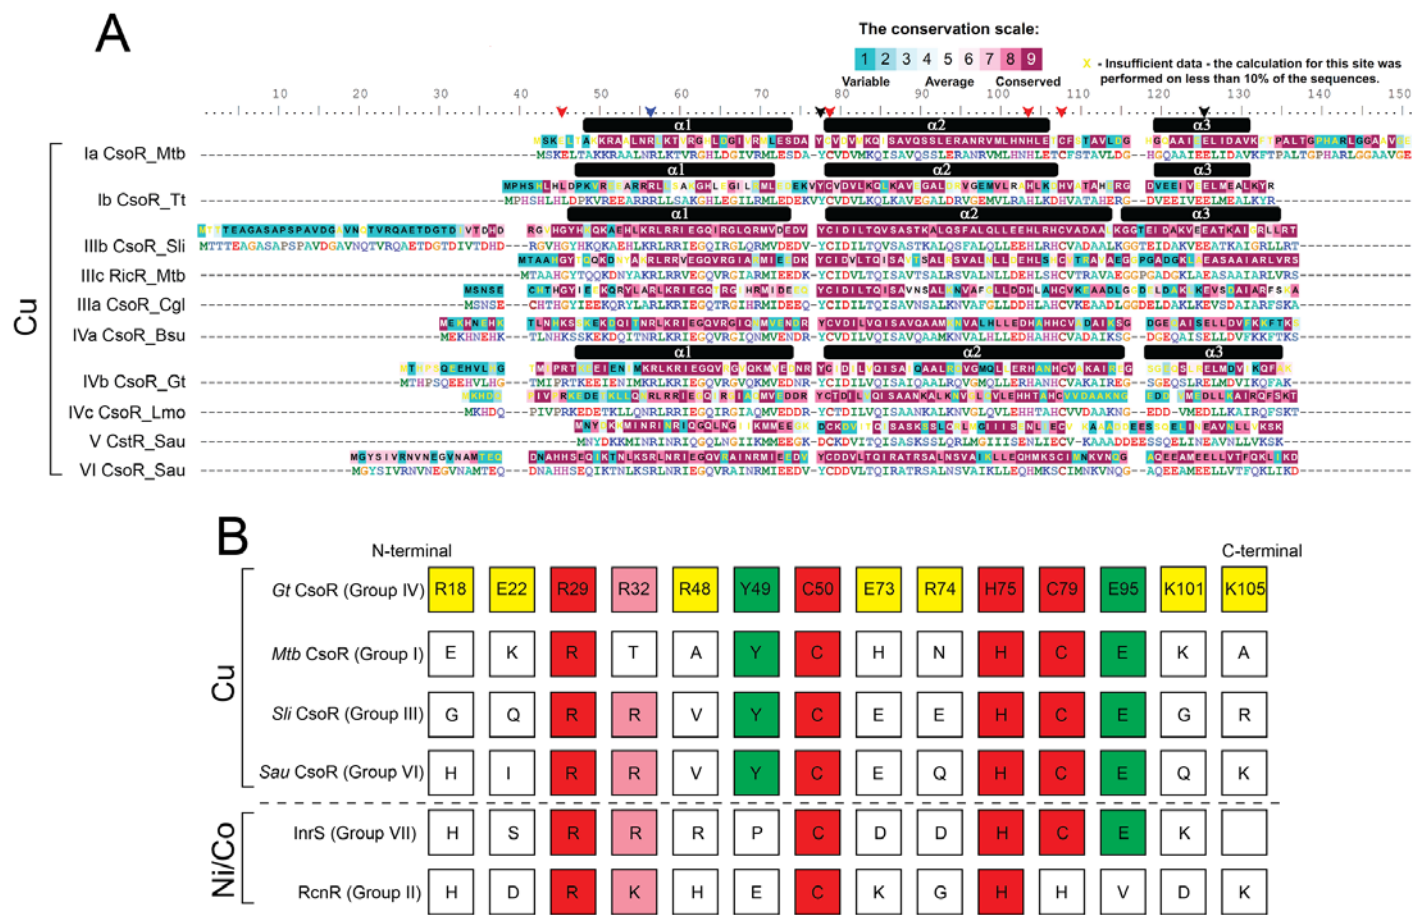

**Fig. S1.** (A) ConSurf analysis of full-length sequences for Cu(I)-sensing CsoR groups. The A-[W-X-Y-Z]-B fingerprints (15) are indicated by *red* (W-Y-Y-Z) and *black* (A,B) arrows (top of the figure), the R residue conserved along all DUF156 proteins (R29 in *Gt* CsoR) is indicated by a *blue* arrow. Secondary structures of CsoRs with defined crystal structure are labeled in black (see Table S1 for pdb codes). (B) Schematic representation of the residue positions that are conserved across all Cu(I)-sensing CsoRs (shaded *red*) vs. group IV clade-specific residue positions (shaded *yellow*, *Gt* CsoR residue number indicated). Those residue positions shaded *pink* are conserved in three of four Cu(I)-containing CsoR groups. Cu(I) second coordination shell ligands (A and B in the fingerprint) are shaded *green* (16).

## Supplementary References

1. Liu, T., Ramesh, A., Ma, Z., Ward, S. K., Zhang, L., George, G. N., Talaat, A. M., Sacchettini, J. C., and Giedroc, D. P. (2007) CsoR is a novel *Mycobacterium tuberculosis* copper-sensing transcriptional regulator. *Nat. Chem. Biol.* **3**, 60-68
2. Sakamoto, K., Agari, Y., Agari, K., Kuramitsu, S., and Shinkai, A. (2010) Structural and functional characterization of the transcriptional repressor CsoR from *Thermus thermophilus* HB8. *Microbiology* **156**, 1993-2005
3. Tao, Z., Jian, T., Shuangyu, Z., Ningfeng, W., and Yunliu, F. (2011) Identification of the Transcriptional Regulator NcrB in the Nickel Resistance Determinant of *Leptospirillum ferriphilum* UBK03. *PLoS ONE* **6**, 1-6
4. Iwig, J. S., Rowe, J. L., and Chivers, P. T. (2006) Nickel homeostasis in *Escherichia coli* - The rcnR-rcnA efflux pathway and its linkage to NikR function. *Mol. Microbiol.* **62**, 252-262
5. Iwig, J. S., and Chivers, P. T. (2009) DNA recognition and wrapping by *Escherichia coli* RcnR. *J. Mol. Biol.* **393**, 514-526
6. Herring, C. D., and Blattner, F. R. (2004) Global transcriptional effects of a suppressor tRNA and the inactivation of the regulator frmR. *J. Bacteriol.* **186**, 6714-6720
7. Teramoto, H., Inui, M., and Yukawa, H. (2012) *Corynebacterium glutamicum* CsoR acts as a transcriptional repressor of two copper/zinc-inducible P(1B)-type ATPase operons. *Biosci. Biotechnol. Biochem.* **76**, 1952-1958
8. Dwarakanath, S., Chaplin, A. K., Hough, M. A., Rigali, S., Vijgenboom, E., and Worrall, J. A. (2012) Response to copper stress in *Streptomyces lividans* extends beyond genes under direct control of a copper-sensitive operon repressor protein (CsoR). *J. Biol. Chem.* **287**, 17833-17847
9. Festa, R. A., Jones, M. B., Butler-Wu, S., Sinsimer, D., Gerads, R., Bishai, W. R., Peterson, S. N., and Darwin, K. H. (2011) A novel copper-responsive regulon in *Mycobacterium tuberculosis*. *Mol. Microbiol.* **79**, 133-148
10. Smaldone, G. T., and Helmann, J. D. (2007) CsoR regulates the copper efflux operon copZA in *Bacillus subtilis*. *Microbiology* **153**, 4123-4128
11. Ma, Z., Cowart, D. M., Scott, R. A., and Giedroc, D. P. (2009) Molecular insights into the metal selectivity of the copper(I)-sensing repressor CsoR from *Bacillus subtilis*. *Biochemistry* **48**, 3325-3334
12. Corbett, D., Schuler, S., Glenn, S., Andrew, P. W., Cavet, J. S., and Roberts, I. S. (2011) The combined actions of the copper-responsive repressor CsoR and copper-metallochaperone CopZ modulate CopA-mediated copper efflux in the intracellular pathogen *Listeria monocytogenes*. *Mol. Microbiol.* **81**, 457-472
13. Grosseohme, N., Kehl-Fie, T. E., Ma, Z., Adams, K. W., Cowart, D. M., Scott, R. A., Skaar, E. P., and Giedroc, D. P. (2011) Control of copper resistance and inorganic sulfur metabolism by paralogous regulators in *Staphylococcus aureus*. *J. Biol. Chem.* **286**, 13522-13531
14. Foster, A. W., Patterson, C. J., Pernil, R., Hess, C. R., and Robinson, N. J. (2012) Cytosolic Ni(II) sensor in cyanobacterium: nickel detection follows nickel affinity across four families of metal sensors. *J. Biol. Chem.* **287**, 12142-12151
15. Ma, Z., Jacobsen, F. E., and Giedroc, D. P. (2009) Coordination chemistry of bacterial metal transport and sensing. *Chem. Rev.* **109**, 4644-4681
16. Ma, Z., Cowart, D. M., Ward, B. P., Arnold, R. J., DiMarchi, R. D., Zhang, L., George, G. N., Scott, R. A., and Giedroc, D. P. (2009) Unnatural amino acid substitution as a probe of the allosteric coupling pathway in a mycobacterial Cu(I) sensor. *J. Am. Chem. Soc.* **131**, 18044-18045
